# Supplementary material
Source: MDPI journal article supplement (https://www.mdpi.com/2077-1312/11/7/1332)
Supplement: s1 [file s1]

## Supplementary material

**Table S1.** Information on the season, month, and location within the farm for each sample, and the number of raw and filtered paired-end sequences per sample.

| No. | Sample ID | Month     | Season | Location  | Raw sequences | Filtered sequences |
|-----|-----------|-----------|--------|-----------|---------------|--------------------|
| 1   | L1B       | June      | Summer | Beginning | 72,524        | 42,875             |
| 2   | L1E       | June      | Summer | End       | 82,424        | 52,010             |
| 3   | S1B       | June      | Summer | Beginning | 79,758        | 51,031             |
| 4   | S1E       | June      | Summer | End       | 53,754        | 35,519             |
| 5   | B1B       | June      | Summer | Beginning | 58,710        | 38,387             |
| 6   | B1E       | June      | Summer | End       | 72,734        | 45,671             |
| 7   | C1        | June      | Summer | Control   | 64,369        | 36,729             |
| 8   | L2B       | June      | Summer | Beginning | 81,608        | 47,011             |
| 9   | L2E       | June      | Summer | End       | 35,289        | 20,723             |
| 10  | S2B       | June      | Summer | Beginning | 45,429        | 26,979             |
| 11  | S2E       | June      | Summer | End       | 39,722        | 26,029             |
| 12  | B2B       | June      | Summer | Beginning | 28,020        | 14,512             |
| 13  | C2        | June      | Summer | Control   | 87,426        | 55,538             |
| 14  | L3B       | July      | Summer | Beginning | 88,604        | 52,700             |
| 15  | L3E       | July      | Summer | End       | 79,956        | 46,284             |
| 16  | S3B       | July      | Summer | Beginning | 37,915        | 24,777             |
| 17  | S3E       | July      | Summer | End       | 38,102        | 25,591             |
| 18  | B3B       | July      | Summer | Beginning | 41,065        | 28,004             |
| 19  | B3E       | July      | Summer | End       | 37,379        | 24,778             |
| 20  | C3        | July      | Summer | Control   | 55,009        | 36,898             |
| 21  | L4B       | August    | Summer | Beginning | 51,036        | 34,040             |
| 22  | L4E       | August    | Summer | End       | 38,582        | 25,967             |
| 23  | S4B       | August    | Summer | Beginning | 38,085        | 25,965             |
| 24  | S4E       | August    | Summer | End       | 69,705        | 43,954             |
| 25  | B4B       | August    | Summer | Beginning | 32,180        | 20,477             |
| 26  | B4E       | August    | Summer | End       | 59,416        | 38,105             |
| 27  | C4        | August    | Summer | Control   | 33,321        | 21,986             |
| 28  | L5E       | August    | Summer | End       | 42,501        | 26,009             |
| 29  | S5E       | August    | Summer | End       | 41,026        | 27,366             |
| 30  | B5B       | August    | Summer | Beginning | 45,631        | 30,561             |
| 31  | C5        | August    | Summer | Control   | 89,780        | 61,267             |
| 32  | L6B       | September | Autumn | Beginning | 51,902        | 33,382             |
| 33  | L6E       | September | Autumn | End       | 46,548        | 28,474             |
| 34  | S6B       | September | Autumn | Beginning | 50,686        | 33,127             |
| 35  | S6E       | September | Autumn | End       | 55,084        | 35,472             |
| 36  | B6B       | September | Autumn | Beginning | 55,323        | 33,824             |
| 37  | B6E       | September | Autumn | End       | 59,734        | 38,429             |
| 38  | C6        | September | Autumn | Control   | 48,143        | 34,351             |

|    |      |          |        |           |         |        |
|----|------|----------|--------|-----------|---------|--------|
| 39 | L7B  | October  | Autumn | Beginning | 51,242  | 32,270 |
| 40 | L7E  | October  | Autumn | End       | 48,067  | 29,981 |
| 41 | S7B  | October  | Autumn | Beginning | 155,868 | 97,115 |
| 42 | S7E  | October  | Autumn | End       | 96,577  | 58,335 |
| 43 | B7B  | October  | Autumn | Beginning | 93,410  | 55,425 |
| 44 | B7E  | October  | Autumn | End       | 92,634  | 53,309 |
| 45 | C7   | October  | Autumn | Control   | 87,399  | 57,364 |
| 46 | L8B  | November | Autumn | Beginning | 45,308  | 27,077 |
| 47 | L8E  | November | Autumn | End       | 69,103  | 36,053 |
| 48 | S8B  | November | Autumn | Beginning | 119,676 | 67,434 |
| 49 | S8E  | November | Autumn | End       | 37,491  | 21,841 |
| 50 | B8B  | November | Autumn | Beginning | 46,415  | 27,021 |
| 51 | B8E  | November | Autumn | End       | 37,298  | 21,199 |
| 52 | C8   | November | Autumn | Control   | 39,666  | 25,738 |
| 53 | L9B  | December | Winter | Beginning | 40,824  | 23,682 |
| 54 | L9E  | December | Winter | End       | 31,035  | 18,505 |
| 55 | S9B  | December | Winter | Beginning | 45,492  | 27,146 |
| 56 | S9E  | December | Winter | End       | 31,171  | 19,006 |
| 57 | B9B  | December | Winter | Beginning | 36,076  | 20,680 |
| 58 | B9E  | December | Winter | End       | 41,039  | 24,731 |
| 59 | L10B | January  | Winter | Beginning | 30,912  | 17,480 |
| 60 | L10E | January  | Winter | End       | 42,531  | 23,065 |
| 61 | S10B | January  | Winter | Beginning | 45,553  | 27,014 |
| 62 | S10E | January  | Winter | End       | 42,190  | 24,395 |
| 63 | B10B | January  | Winter | Beginning | 42,511  | 26,495 |
| 64 | B10E | January  | Winter | End       | 45,638  | 27,423 |
| 65 | C10  | January  | Winter | Control   | 37,724  | 23,400 |
| 66 | L11B | February | Winter | Beginning | 35,343  | 21,315 |
| 67 | L11E | February | Winter | End       | 40,378  | 24,171 |
| 68 | S11B | February | Winter | Beginning | 34,770  | 21,045 |
| 69 | S11E | February | Winter | End       | 32,813  | 19,518 |
| 70 | B11B | February | Winter | Beginning | 32,553  | 18,913 |
| 71 | B11E | February | Winter | End       | 29,296  | 17,140 |
| 72 | C11  | February | Winter | Control   | 30,960  | 19,131 |
| 73 | L12B | March    | Spring | Beginning | 60,968  | 31,393 |
| 74 | L12E | March    | Spring | End       | 74,145  | 38,714 |
| 75 | S12B | March    | Spring | Beginning | 60,723  | 36,051 |
| 76 | S12E | March    | Spring | End       | 52,151  | 28,120 |
| 77 | B12B | March    | Spring | Beginning | 66,272  | 35,144 |
| 78 | B12E | March    | Spring | End       | 65,686  | 33,548 |
| 79 | C12  | March    | Spring | Control   | 54,790  | 30,554 |
| 80 | L13B | April    | Spring | Beginning | 53,014  | 28,831 |
| 81 | L13E | April    | Spring | End       | 75,880  | 37,206 |
| 82 | S13B | April    | Spring | Beginning | 70,116  | 39,154 |

|     |         |       |        |           |         |         |
|-----|---------|-------|--------|-----------|---------|---------|
| 83  | S13E    | April | Spring | End       | 67,251  | 36,402  |
| 84  | B13B    | April | Spring | Beginning | 81,974  | 44,207  |
| 85  | B13E    | April | Spring | End       | 76,558  | 41,670  |
| 86  | C13     | April | Spring | Control   | 68,541  | 39,509  |
| 87  | L14B    | April | Spring | Beginning | 239,674 | 133,544 |
| 88  | L14E    | April | Spring | End       | 103,616 | 55,990  |
| 89  | S14B    | April | Spring | Beginning | 64,881  | 38,260  |
| 90  | S14E    | April | Spring | End       | 93,387  | 48,393  |
| 91  | B14B    | April | Spring | Beginning | 62,655  | 32,921  |
| 92  | B14E    | April | Spring | End       | 100,684 | 53,926  |
| 93  | C14     | April | Spring | Control   | 85,005  | 48,132  |
| 94  | L15B    | May   | Spring | Beginning | 59,638  | 31,193  |
| 95  | L15E    | May   | Spring | End       | 58,863  | 32,561  |
| 96  | S15B    | May   | Spring | Beginning | 60,347  | 33,278  |
| 97  | S15E    | May   | Spring | End       | 35,924  | 19,827  |
| 98  | B15B    | May   | Spring | Beginning | 48,134  | 28,547  |
| 99  | B15E    | May   | Spring | End       | 66,008  | 39,587  |
| 100 | C15     | May   | Spring | Control   | 58,672  | 35,635  |
| -   | Average | -     | -      | -         | 59,230  | 35,115  |

**Table S2.** Alpha diversity indices per sample.

| No. | Sample ID | Observed | Shannon | Simpson | Inverse Simpson |
|-----|-----------|----------|---------|---------|-----------------|
| 1   | L1B       | 290      | 4.427   | 0.975   | 39.782          |
| 2   | L1E       | 314      | 4.222   | 0.961   | 25.959          |
| 3   | S1B       | 352      | 4.428   | 0.966   | 29.254          |
| 4   | S1E       | 240      | 4.132   | 0.963   | 26.917          |
| 5   | B1B       | 315      | 4.598   | 0.979   | 47.289          |
| 6   | B1E       | 327      | 4.619   | 0.979   | 46.983          |
| 7   | C1        | 449      | 5.235   | 0.989   | 93.064          |
| 8   | L2B       | 388      | 4.859   | 0.984   | 61.168          |
| 9   | L2E       | 297      | 4.692   | 0.982   | 54.528          |
| 10  | S2B       | 301      | 4.767   | 0.985   | 64.591          |
| 11  | S2E       | 252      | 4.354   | 0.974   | 39.160          |
| 12  | B2B       | 237      | 4.701   | 0.984   | 64.243          |
| 13  | C2        | 566      | 5.335   | 0.990   | 101.743         |
| 14  | L3B       | 360      | 4.389   | 0.970   | 32.934          |
| 15  | L3E       | 357      | 4.385   | 0.967   | 30.040          |
| 16  | S3B       | 278      | 4.568   | 0.979   | 47.782          |
| 17  | S3E       | 242      | 4.305   | 0.970   | 33.486          |
| 18  | B3B       | 313      | 4.881   | 0.988   | 81.428          |
| 19  | B3E       | 262      | 4.640   | 0.983   | 57.439          |
| 20  | C3        | 472      | 5.320   | 0.991   | 110.905         |

|    |      |     |       |       |        |
|----|------|-----|-------|-------|--------|
| 21 | L4B  | 275 | 4.064 | 0.951 | 20.495 |
| 22 | L4E  | 229 | 3.938 | 0.950 | 20.156 |
| 23 | S4B  | 266 | 4.283 | 0.965 | 28.738 |
| 24 | S4E  | 243 | 4.016 | 0.957 | 23.362 |
| 25 | B4B  | 251 | 4.506 | 0.976 | 40.998 |
| 26 | B4E  | 277 | 4.270 | 0.966 | 29.320 |
| 27 | C4   | 264 | 4.702 | 0.983 | 59.418 |
| 28 | L5E  | 272 | 4.310 | 0.967 | 30.382 |
| 29 | S5E  | 220 | 3.997 | 0.957 | 23.050 |
| 30 | B5B  | 276 | 4.280 | 0.962 | 26.161 |
| 31 | C5   | 459 | 4.993 | 0.984 | 63.053 |
| 32 | L6B  | 263 | 3.956 | 0.942 | 17.251 |
| 33 | L6E  | 290 | 4.261 | 0.960 | 25.032 |
| 34 | S6B  | 280 | 4.155 | 0.959 | 24.232 |
| 35 | S6E  | 249 | 3.944 | 0.949 | 19.721 |
| 36 | B6B  | 321 | 4.474 | 0.968 | 31.649 |
| 37 | B6E  | 257 | 4.073 | 0.956 | 22.577 |
| 38 | C6   | 320 | 4.673 | 0.974 | 39.158 |
| 39 | L7B  | 290 | 4.223 | 0.965 | 28.214 |
| 40 | L7E  | 249 | 3.952 | 0.956 | 22.786 |
| 41 | S7B  | 422 | 4.258 | 0.962 | 26.357 |
| 42 | S7E  | 341 | 4.046 | 0.955 | 22.121 |
| 43 | B7B  | 347 | 4.095 | 0.958 | 23.894 |
| 44 | B7E  | 355 | 4.178 | 0.961 | 25.561 |
| 45 | C7   | 448 | 4.892 | 0.974 | 39.105 |
| 46 | L8B  | 279 | 4.096 | 0.956 | 22.577 |
| 47 | L8E  | 316 | 4.167 | 0.960 | 24.815 |
| 48 | S8B  | 461 | 4.490 | 0.966 | 29.454 |
| 49 | S8E  | 227 | 3.927 | 0.952 | 20.780 |
| 50 | B8B  | 283 | 4.256 | 0.964 | 27.955 |
| 51 | B8E  | 239 | 4.064 | 0.958 | 23.720 |
| 52 | C8   | 352 | 4.882 | 0.978 | 44.653 |
| 53 | L9B  | 313 | 4.456 | 0.962 | 26.576 |
| 54 | L9E  | 268 | 4.061 | 0.935 | 15.499 |
| 55 | S9B  | 292 | 4.036 | 0.944 | 17.778 |
| 56 | S9E  | 225 | 3.768 | 0.930 | 14.250 |
| 57 | B9B  | 314 | 4.845 | 0.982 | 57.023 |
| 58 | B9E  | 281 | 4.080 | 0.938 | 16.005 |
| 59 | L10B | 341 | 5.068 | 0.988 | 84.216 |
| 60 | L10E | 380 | 4.992 | 0.984 | 63.576 |
| 61 | S10B | 429 | 5.134 | 0.987 | 76.300 |
| 62 | S10E | 337 | 4.358 | 0.951 | 20.407 |
| 63 | B10B | 410 | 5.184 | 0.989 | 92.312 |
| 64 | B10E | 416 | 4.964 | 0.981 | 53.047 |

|     |      |     |       |       |         |
|-----|------|-----|-------|-------|---------|
| 65  | C9   | 397 | 5.240 | 0.990 | 97.303  |
| 66  | L11B | 401 | 5.247 | 0.990 | 103.753 |
| 67  | L11E | 430 | 5.278 | 0.990 | 99.571  |
| 68  | S11B | 390 | 5.212 | 0.989 | 91.269  |
| 69  | S11E | 363 | 5.027 | 0.985 | 67.930  |
| 70  | B11B | 373 | 5.230 | 0.990 | 97.412  |
| 71  | B11E | 352 | 4.993 | 0.983 | 58.308  |
| 72  | C10  | 372 | 5.219 | 0.989 | 91.526  |
| 73  | L12B | 461 | 5.201 | 0.988 | 82.110  |
| 74  | L12E | 499 | 5.270 | 0.989 | 89.052  |
| 75  | S12B | 378 | 4.158 | 0.949 | 19.569  |
| 76  | S12E | 375 | 4.724 | 0.972 | 36.246  |
| 77  | B12B | 474 | 5.248 | 0.989 | 88.691  |
| 78  | B12E | 444 | 5.018 | 0.983 | 58.352  |
| 79  | C12  | 445 | 5.206 | 0.986 | 72.889  |
| 80  | L13B | 321 | 4.571 | 0.976 | 41.390  |
| 81  | L13E | 472 | 4.935 | 0.983 | 57.321  |
| 82  | S13B | 373 | 4.594 | 0.968 | 31.378  |
| 83  | S13E | 323 | 4.214 | 0.957 | 23.016  |
| 84  | B13B | 429 | 4.791 | 0.980 | 49.297  |
| 85  | B13E | 374 | 4.617 | 0.975 | 39.502  |
| 86  | C13  | 404 | 4.872 | 0.979 | 47.815  |
| 87  | L14B | 498 | 4.854 | 0.982 | 55.581  |
| 88  | L14E | 328 | 4.527 | 0.976 | 42.474  |
| 89  | S14B | 275 | 4.396 | 0.973 | 36.412  |
| 90  | S14E | 285 | 4.253 | 0.966 | 29.290  |
| 91  | B14B | 273 | 4.390 | 0.974 | 38.970  |
| 92  | B14E | 360 | 4.584 | 0.978 | 45.775  |
| 93  | C14  | 387 | 4.879 | 0.982 | 56.824  |
| 94  | L15B | 371 | 4.653 | 0.974 | 38.805  |
| 95  | L15E | 283 | 4.437 | 0.973 | 36.686  |
| 96  | S15B | 337 | 4.349 | 0.969 | 31.752  |
| 97  | S15E | 181 | 4.108 | 0.965 | 28.542  |
| 98  | B15B | 281 | 4.466 | 0.976 | 40.913  |
| 99  | B15E | 283 | 4.472 | 0.976 | 41.372  |
| 100 | C15  | 385 | 5.024 | 0.986 | 72.232  |

**Table S3.** PERMANOVA results of the pairwise comparisons between each season using the Bray-Curtis dissimilarity matrix and the weighted UniFrac metric on the bacterial ASVs for all seawater samples. Significant codes: '\*\*\*': 0; '\*\*': 0.001; '\*': 0.01; '.'': 0.05; ' ': 0.1.

|                         | Bray-Curtis |                |           | Weighted UniFrac |                |           |
|-------------------------|-------------|----------------|-----------|------------------|----------------|-----------|
|                         | F           | R <sup>2</sup> | p-value   | F                | R <sup>2</sup> | p-value   |
| <b>Winter vs Summer</b> | 30.22       | 0.38           | 0.001 *** | 34.08            | 0.41           | 0.001 *** |
| <b>Winter vs Autumn</b> | 25.85       | 0.40           | 0.001 *** | 27.42            | 0.41           | 0.001 *** |
| <b>Winter vs Spring</b> | 15.56       | 0.25           | 0.001 *** | 13.93            | 0.23           | 0.001 *** |
| <b>Summer vs Autumn</b> | 14.03       | 0.22           | 0.001 *** | 8.70             | 0.15           | 0.001 *** |
| <b>Summer vs Spring</b> | 13.85       | 0.20           | 0.001 *** | 14.71            | 0.21           | 0.001 *** |
| <b>Autumn vs Spring</b> | 22.99       | 0.33           | 0.001 *** | 21.29            | 0.31           | 0.001 *** |

**Table S4.** Number of enriched ASVs (En) in pairwise comparisons between the four seasons in aquaculture farms ( $\log_2(\text{fc}) \geq 2$ ,  $p\text{-adjust} < 0.01$ ). Columns show the season to which the number of enriched ASVs corresponds, while rows show the season compared to which the ASVs were found enriched.

|               | En ASVs in Summer | En ASVs in Autumn | En ASVs in Winter | En ASVs in Spring |
|---------------|-------------------|-------------------|-------------------|-------------------|
| <b>Summer</b> | -                 | 14                | 112               | 7                 |
| <b>Autumn</b> | 59                | -                 | 95                | 118               |
| <b>Winter</b> | 48                | 33                | -                 | 15                |
| <b>Spring</b> | 40                | 31                | 54                | -                 |

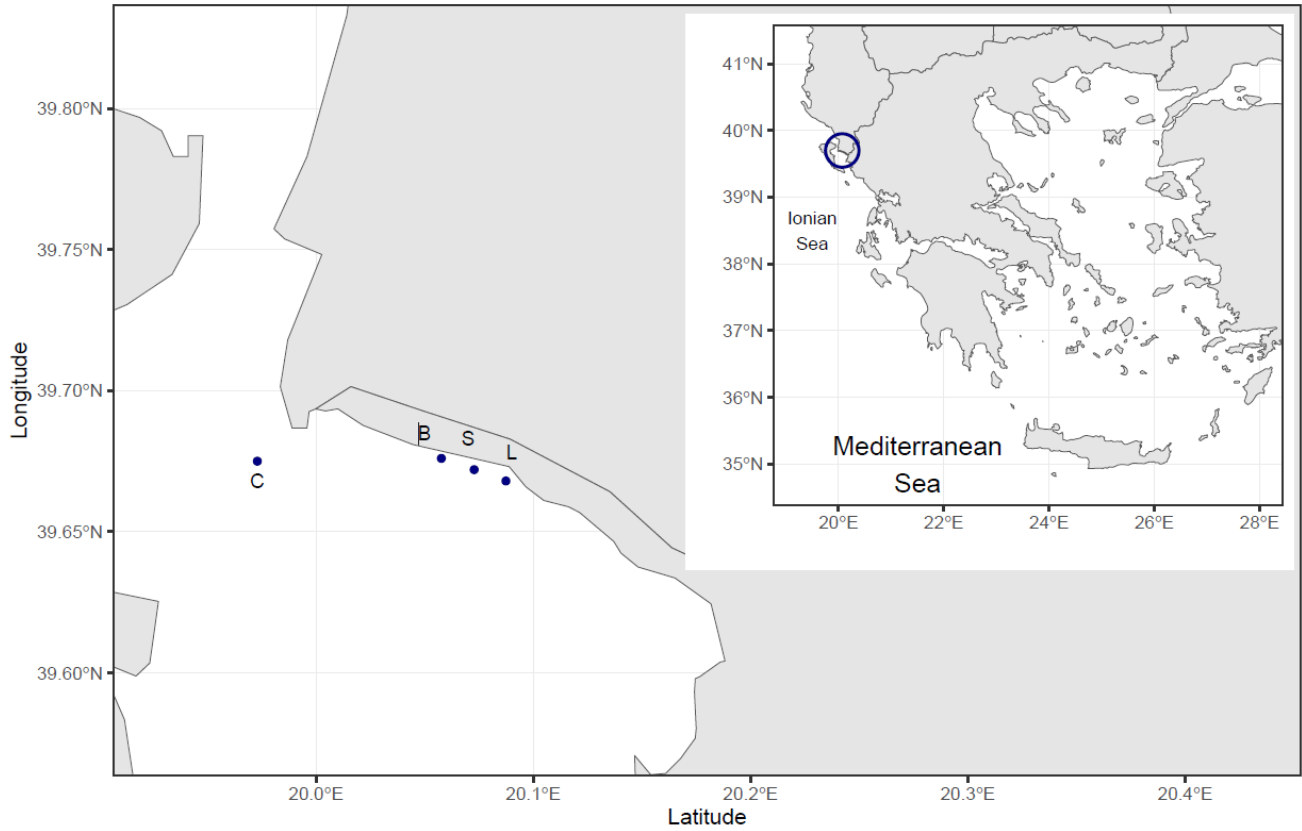

**Figure S1.** Map of the study sites. The blue circle on the upper-right-corner map denotes the wider region of Greece in which the area under investigation is located. The three aquaculture farms' units and the control location are indicated by blue dots; B: Bastia aquaculture farm, S: Skalama aquaculture farm, L: Lorida aquaculture farm, C: Control site.





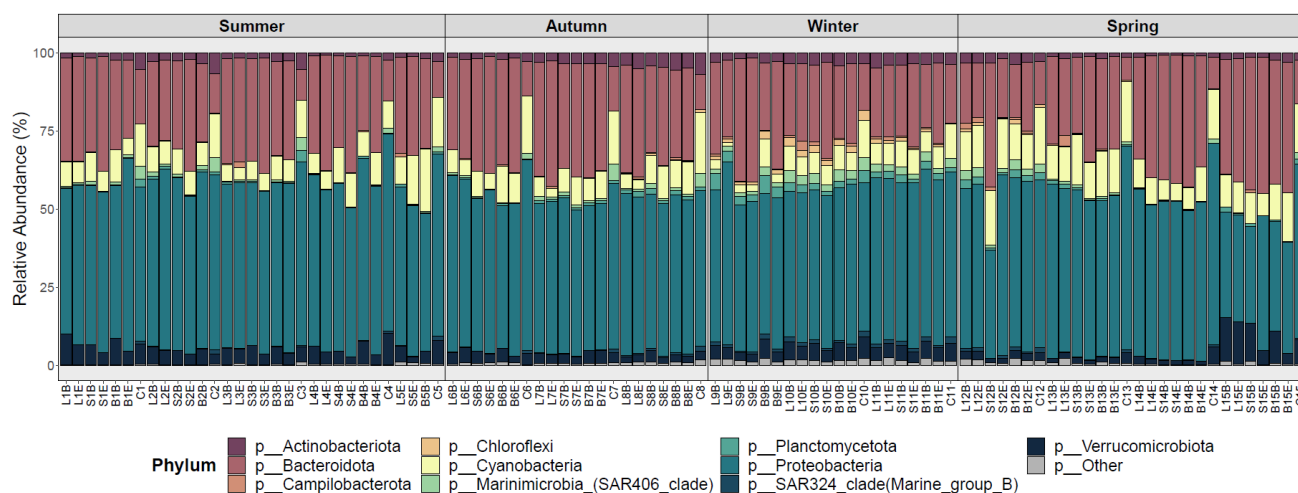

**Figure S3.** Barplot of relative abundance per sample at the phylum taxonomic level. The 10 most abundant phyla in the seawater samples from the aquaculture farms and the control site are presented. The remaining phyla are included under the “Other” category.

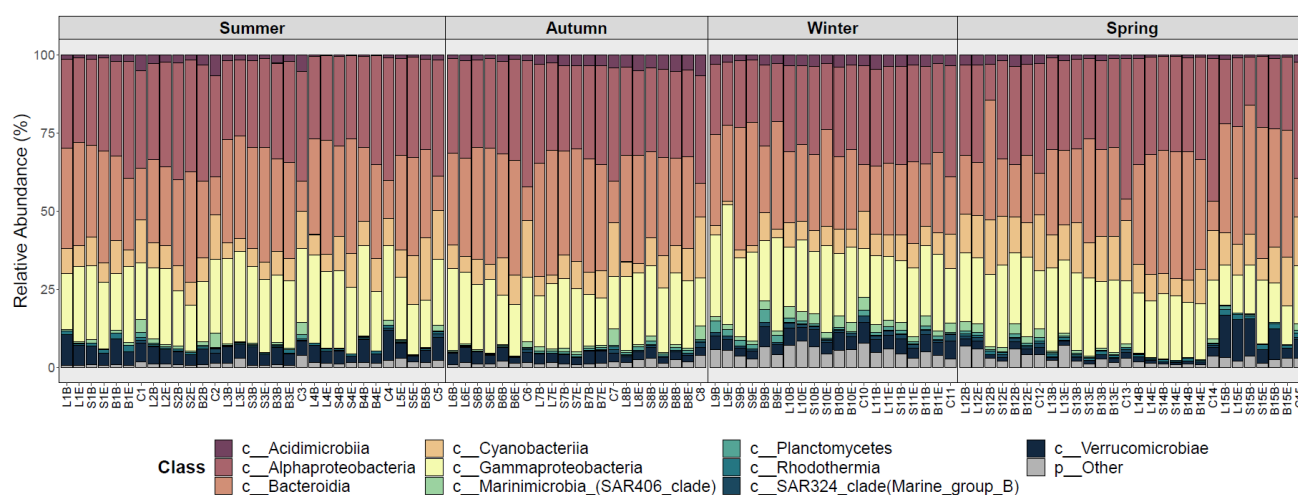

**Figure S4.** Barplot of relative abundance per sample at the class taxonomic level. The 10 most abundant classes in the seawater samples from the aquaculture farms and the control site are presented. The remaining classes are included under the “Other” category.

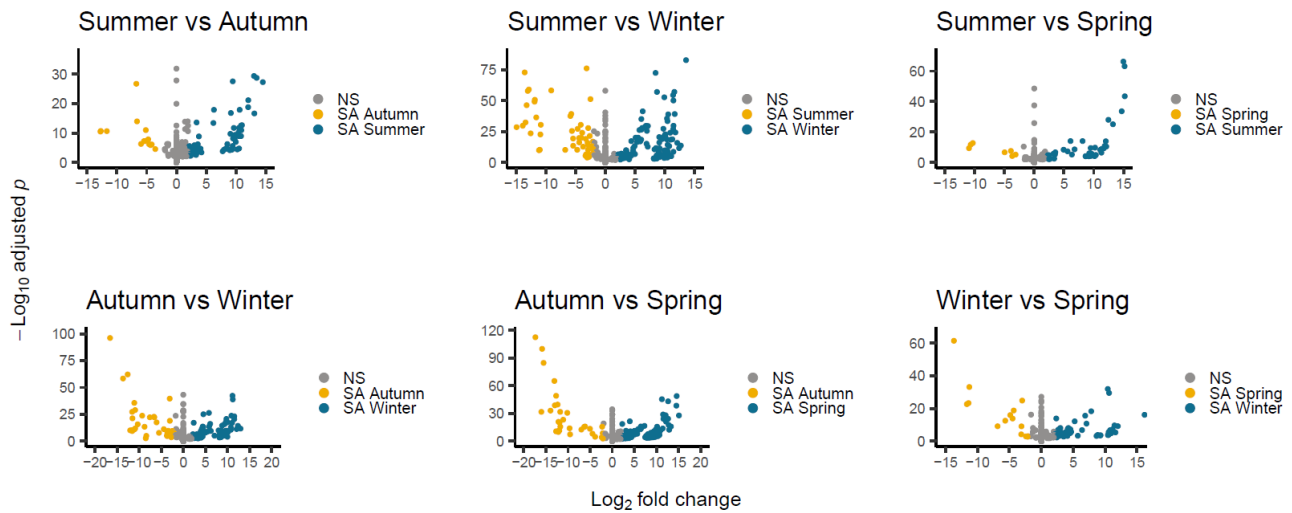

**Figure S5.** Volcano plots of the differentially abundant ASVs identified in the pairwise comparisons between seasons in the three aquaculture farms (Lorida, Bastia, Skaloma). Yellow and blue dots indicate differentially abundant ASVs (SA at absolute  $\log_2(\text{fold-change}) \geq 2$  and Benjamini-Hochberg adjusted  $p$ -value  $< 0.01$  cutoffs), and not significant ASVs are presented with grey (NS).
